# Supplementary material
Source: PubMed Central journal article supplement (PMC5221529)
Supplement: rsif20160800supp1.pdf [file rsif20160800supp1.pdf]

## Supplementary Information

### Uncovering Emergent Interactions in Three-Way Combinations of Stressors

*Journal of the Royal Society Interface*

Casey Beppler<sup>\*1,2</sup>, Elif Tekin<sup>\*3</sup>, Zhiyuan Mao<sup>1,2</sup>, Cynthia White<sup>1</sup>, Cassandra McDiarmid<sup>1</sup>, Emily Vargas<sup>1</sup>, Jeffrey H. Miller<sup>2</sup>, Van M. Savage<sup>1,3,4</sup>, and Pamela J. Yeh<sup>\*\*1</sup>

<sup>1</sup>Department of Ecology and Evolutionary Biology, University of California, Los Angeles, California 90095, USA

<sup>2</sup>Department of Microbiology, Immunology, and Molecular Genetics, the Molecular Biology Institute, and the David Geffen School of Medicine, University of California, Los Angeles, California 90095, USA

<sup>3</sup>Department of Biomathematics, University of California, David Geffen School of Medicine, Los Angeles, California 90095, USA

<sup>4</sup>Santa Fe Institute, Santa Fe, New Mexico 87501, USA

\*Authors contributed equally.

\*\*Corresponding Author. Phone: (310) 825-7441. Fax: (310) 206-0484. Email: [pamelayeh@ucla.edu](mailto:pamelayeh@ucla.edu). Mailing Address: 612 Charles E. Young Drive East, Room 120, Box 957246, Los Angeles, California 90095-1606.

**Supplementary Figure 1. Illustration of the emergent three-way (E3) interaction**

**measure.** The E3 measure,  $\hat{\epsilon}_{X,Y,Z}$ , can be expressed as a difference between how drugs X, Y, and Z interact as compared to the effects originating solely from each pairwise interaction. As such,  $\hat{\epsilon}_{X,Y,Z}$  (the schematic on the far left) measures any emergent parts of the three-way interaction that cannot be explained in terms of pairwise interactions.

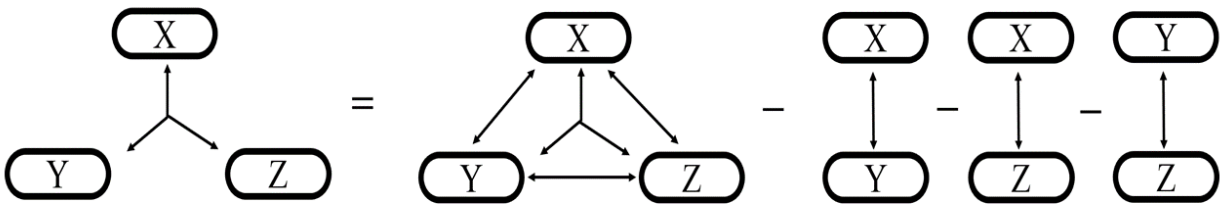

**Supplementary Figure 2. Triple-drug interactions. A.** Data for triple-antibiotic figures are shown for both deviation from additivity (DA) and emergent three-way (E3) interactions. Figures are presented as described in Figs 1 and 2. Drug abbreviations and concentrations are listed in Table 1. Note that the only potential difference in figures for DA and E3 is the coloring of the triple-drug interaction, and in cases where both measures agree, the coloring of the triple-drug interaction is the same. For synergy, both measures agree in the case of CLI+CPR+STR and CLI+CPR+ERY (see main text Fig. 3), and for antagonism, CPR+ERY+TOB. The following triple drug interactions differ between the two measures: ERY+FOX+STR, CPR+ERY+STR, CLI+FOX+TOB, CLI+ERY+STR, CLI+ERY+TOB, CPR+CLI+TOB, CPR+FOX+TOB, and CLI+CPR+FOX. **B.** The same data shown in traditional bar graph format.

**A**

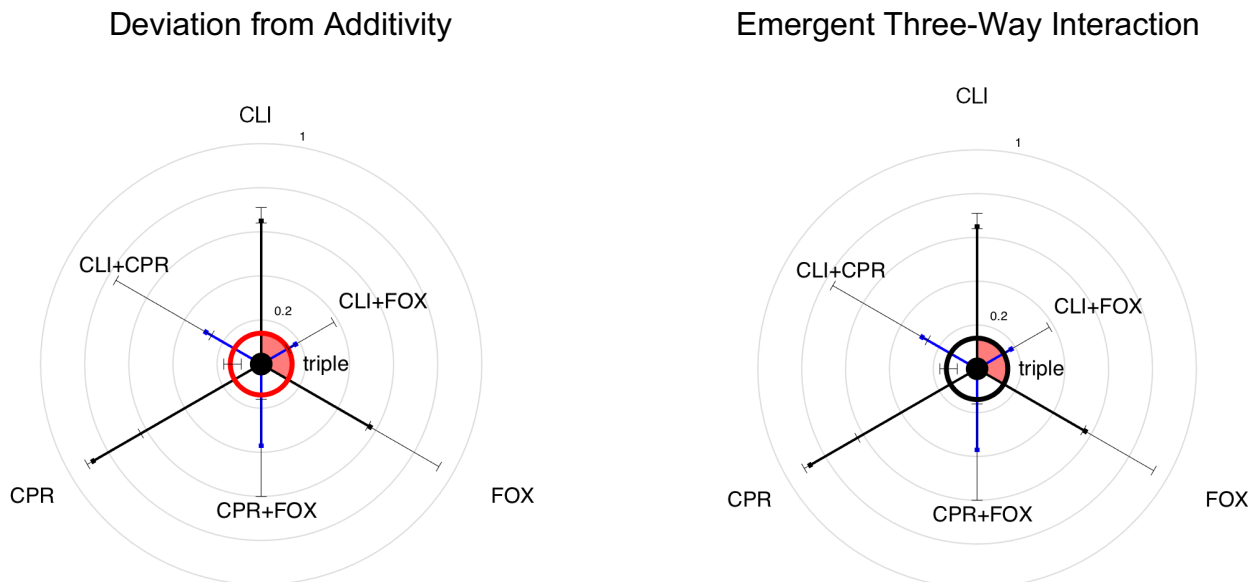

Deviation from Additivity

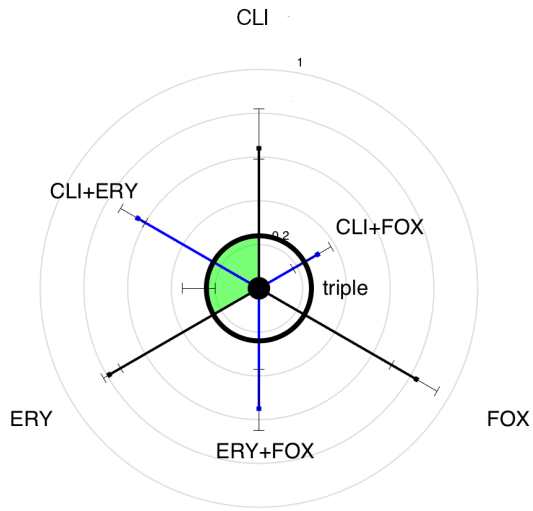

Emergent Three-Way Interaction

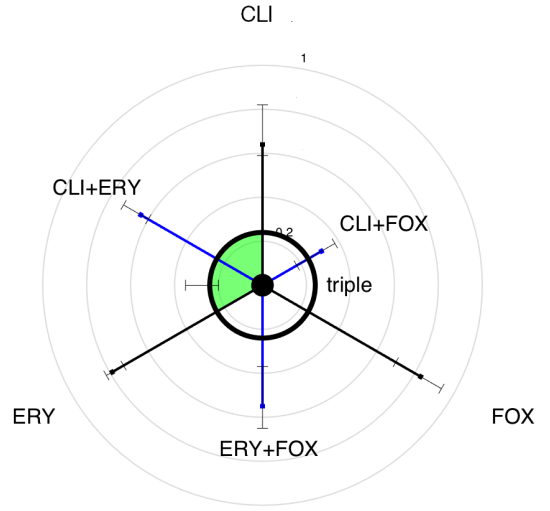

Deviation from Additivity

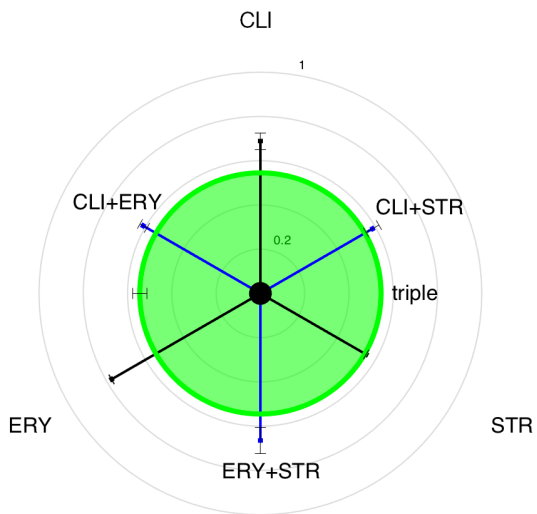

Emergent Three-Way Interaction

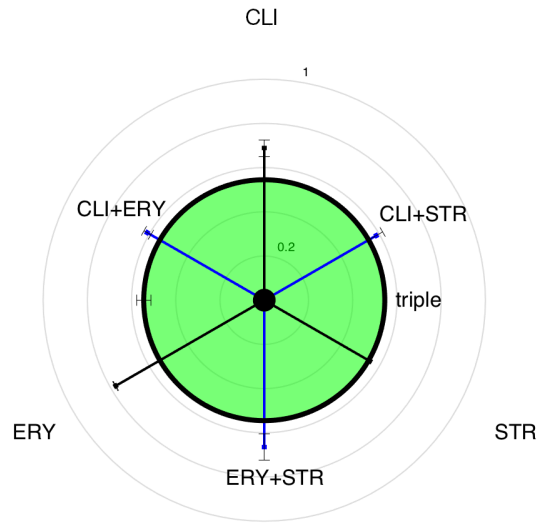

Deviation from Additivity

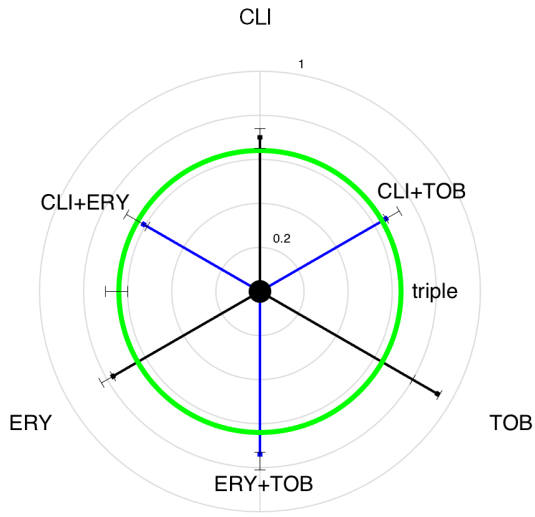

Emergent Three-Way Interaction

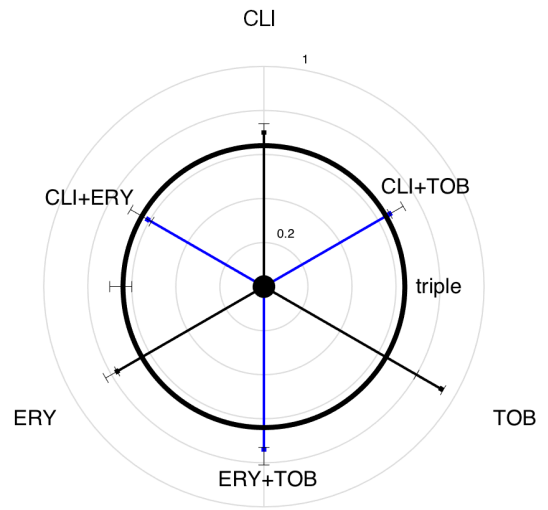

Deviation from Additivity

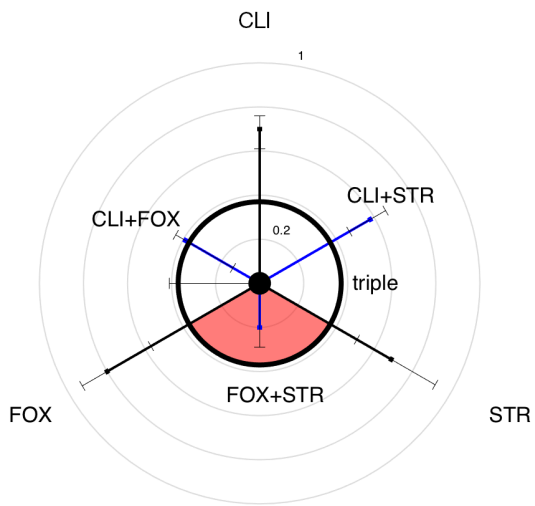

Emergent Three-Way Interaction

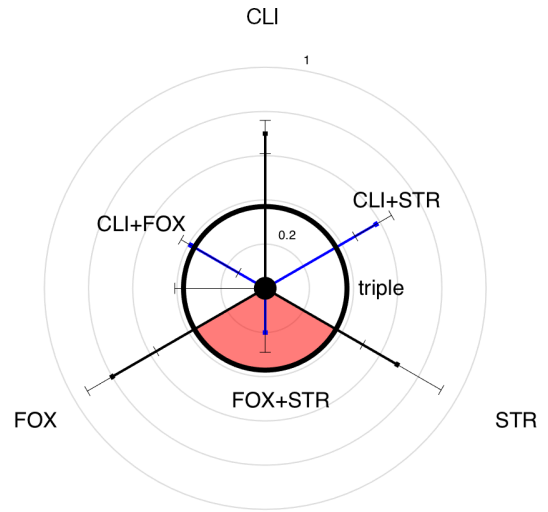

Deviation from Additivity

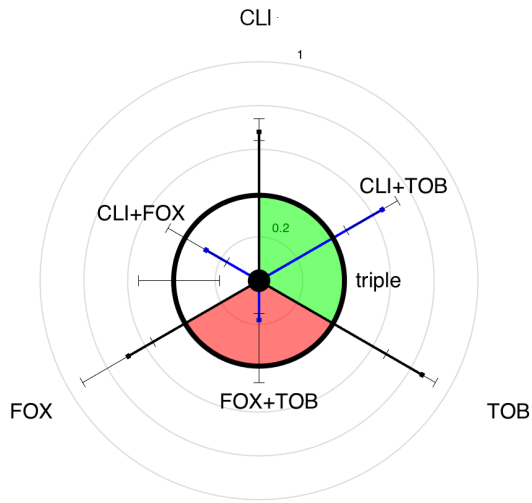

Emergent Three-Way Interaction

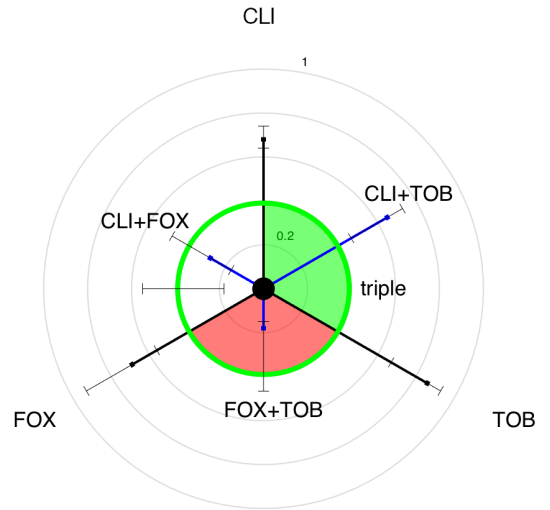

Deviation from Additivity

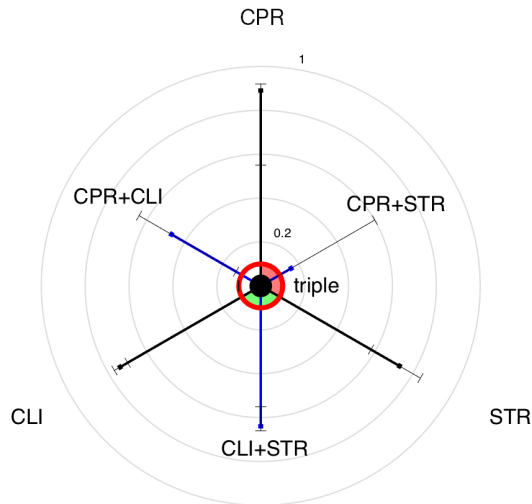

Emergent Three-Way Interaction

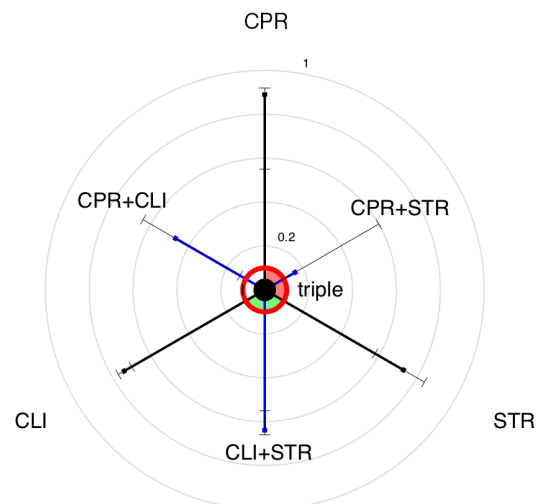

Deviation from Additivity

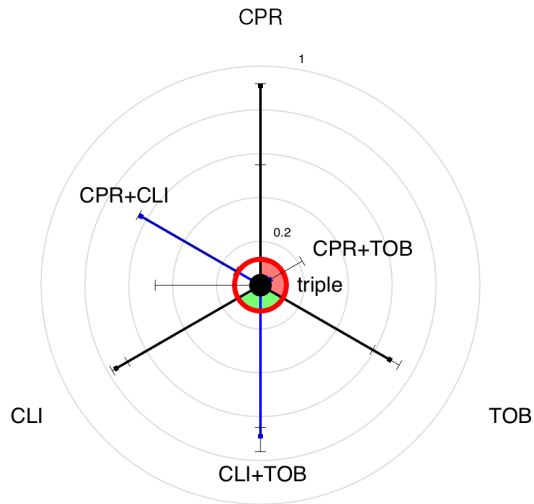

Emergent Three-Way Interaction

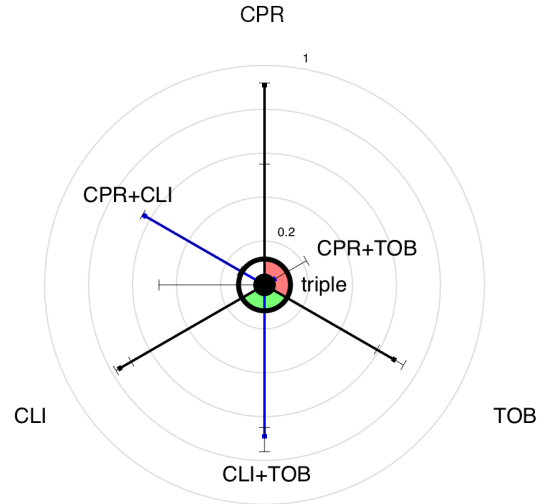

Deviation from Additivity

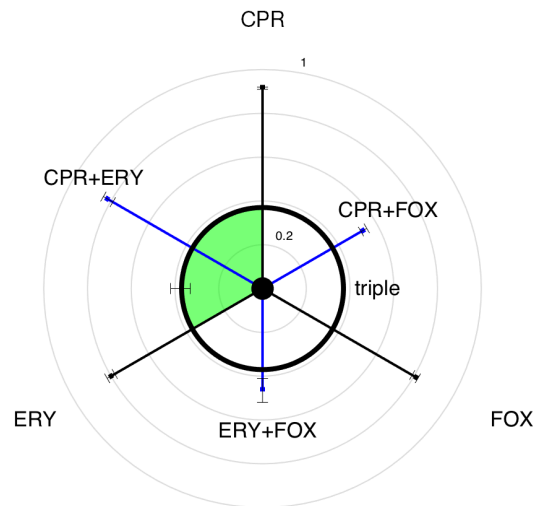

Emergent Three-Way Interaction

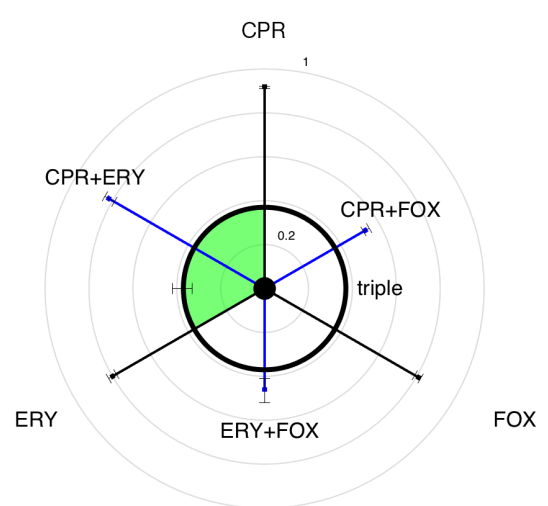

Deviation from Additivity

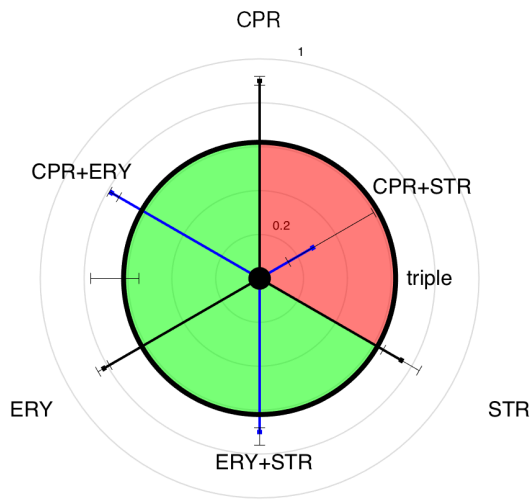

Emergent Three-Way Interaction

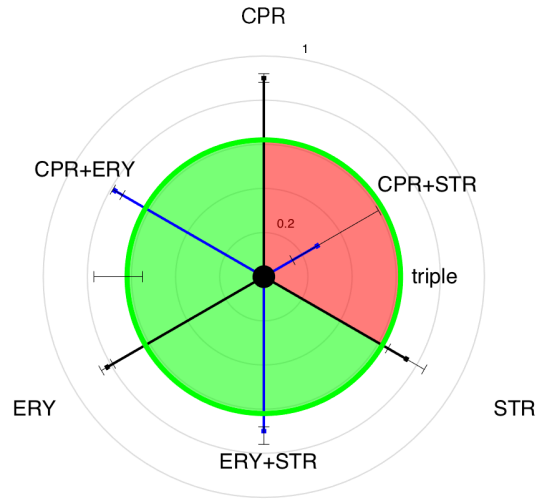

Deviation from Additivity

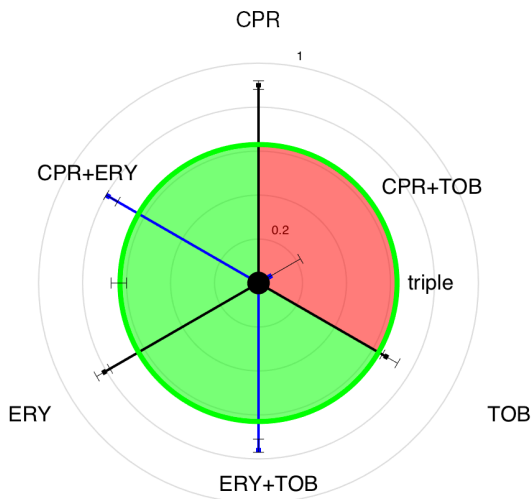

Emergent Three-Way Interaction

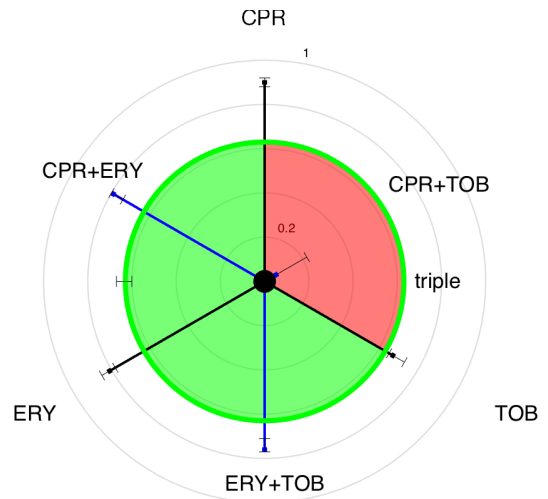



Deviation from Additivity

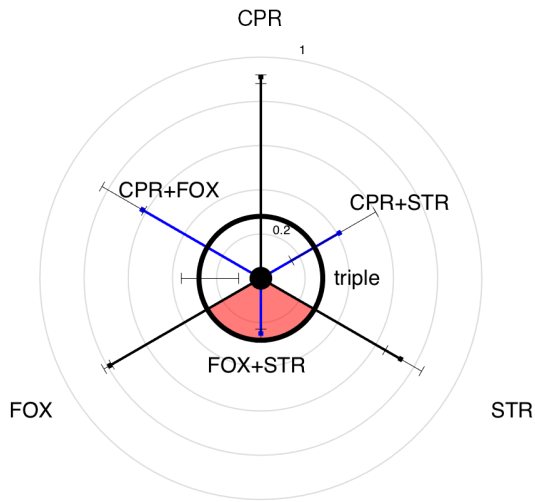

Emergent Three-Way Interaction

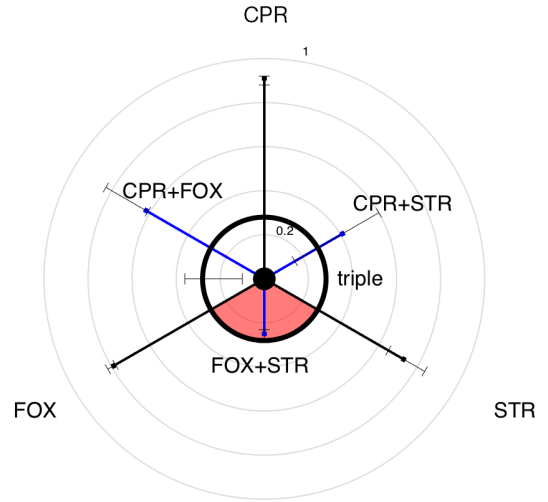

Deviation from Additivity

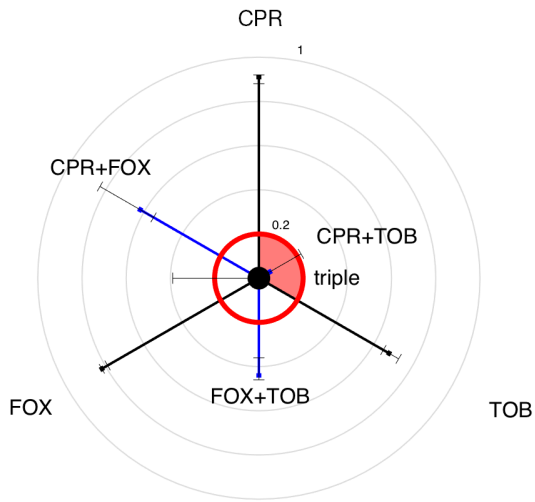

Emergent Three-Way Interaction

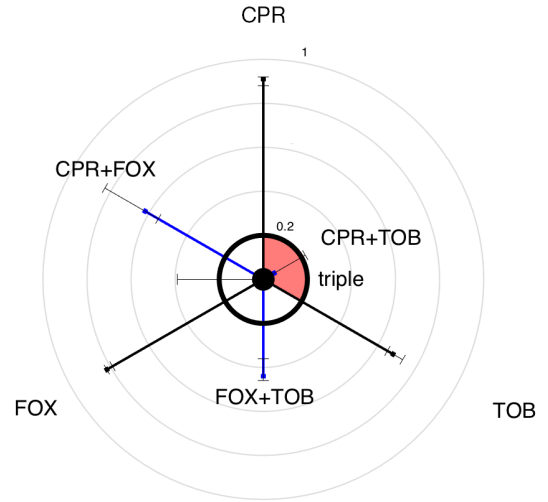

Deviation from Additivity

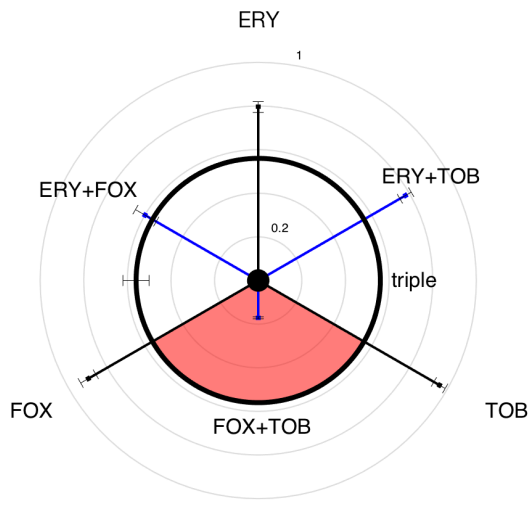

Emergent Three-Way Interaction

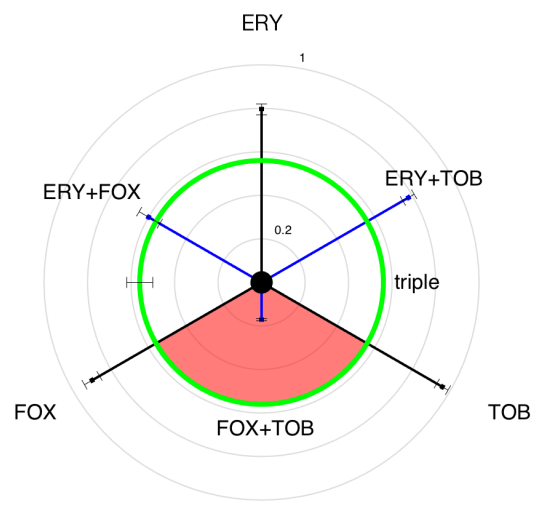

**B**

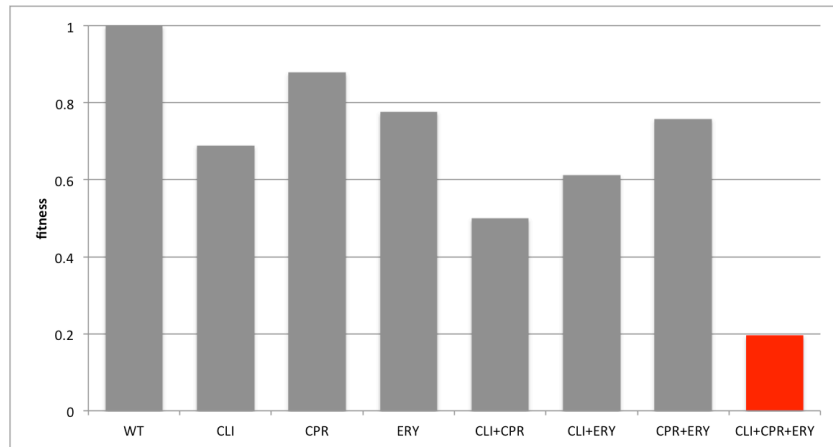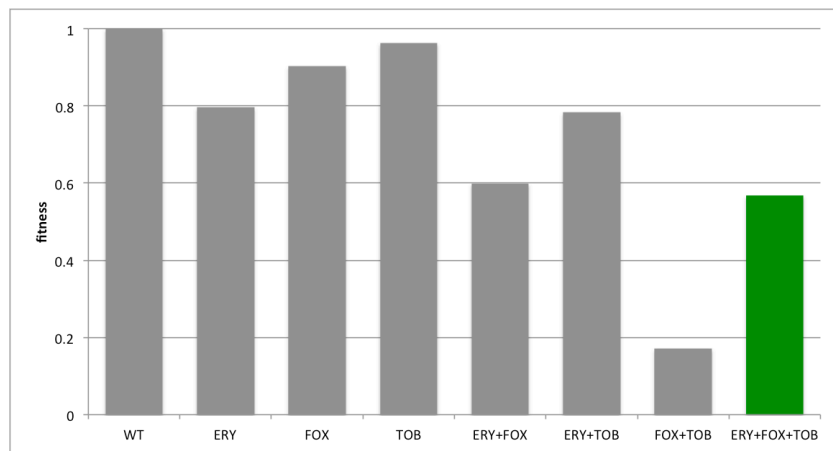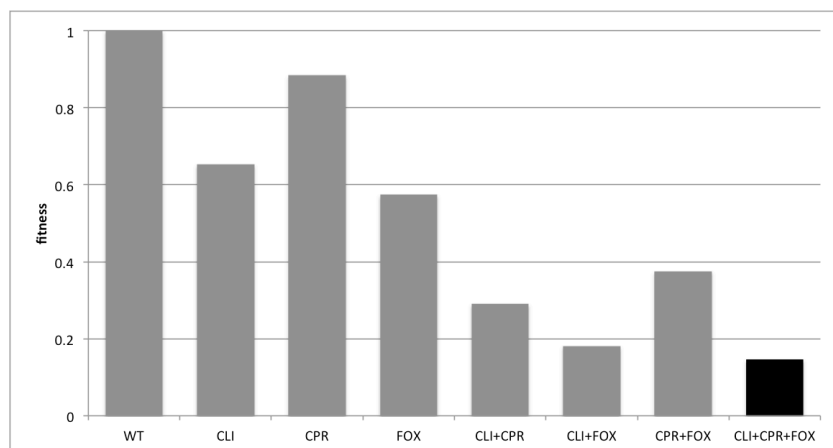

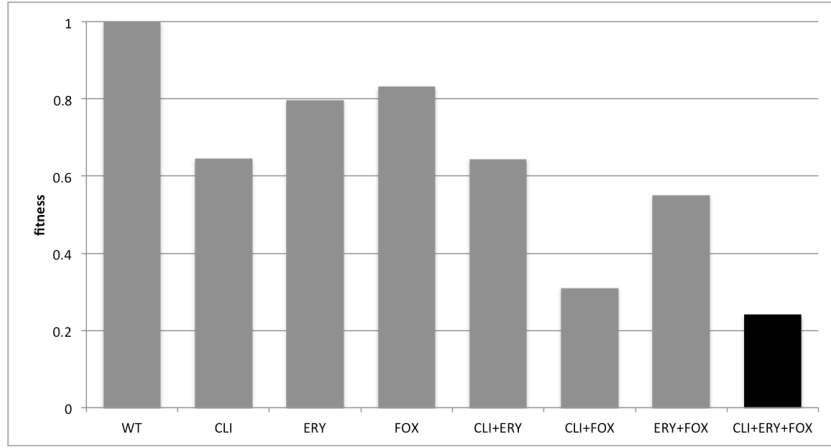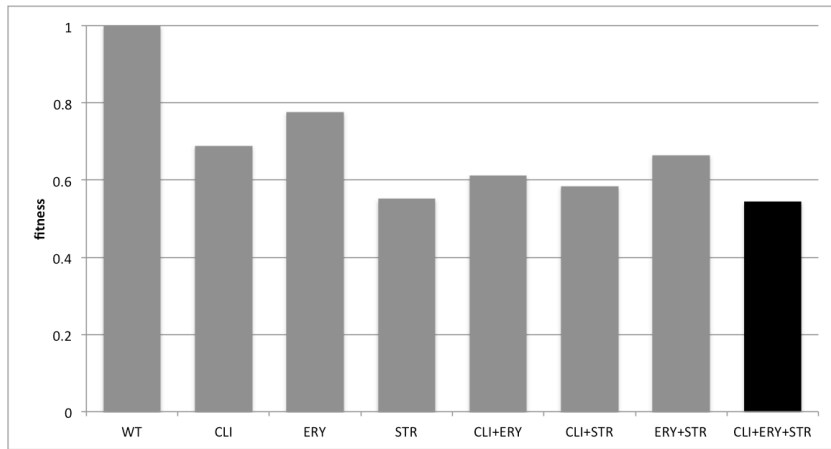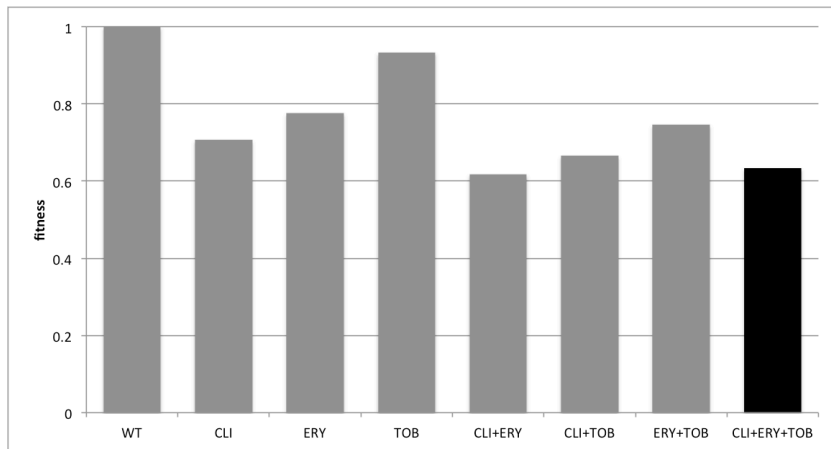

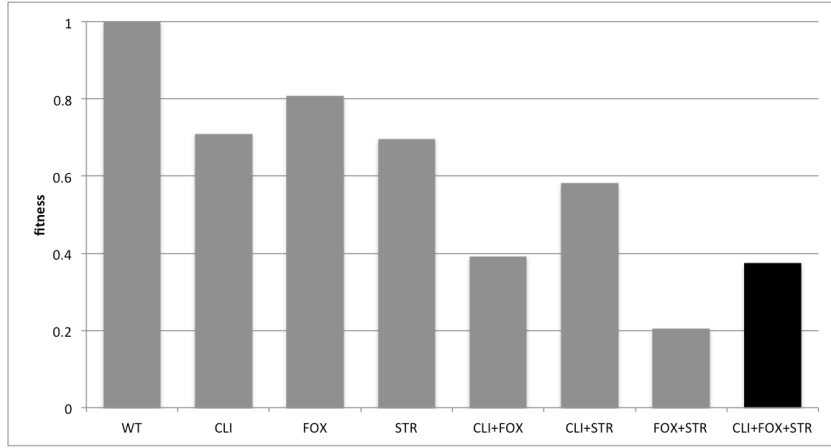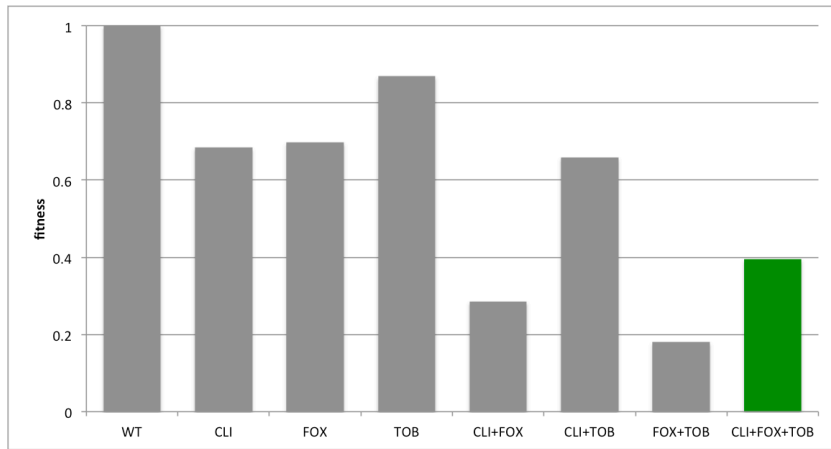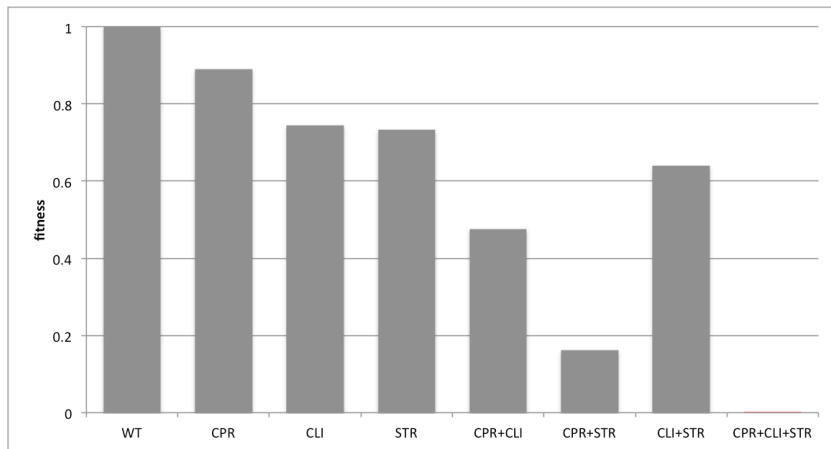

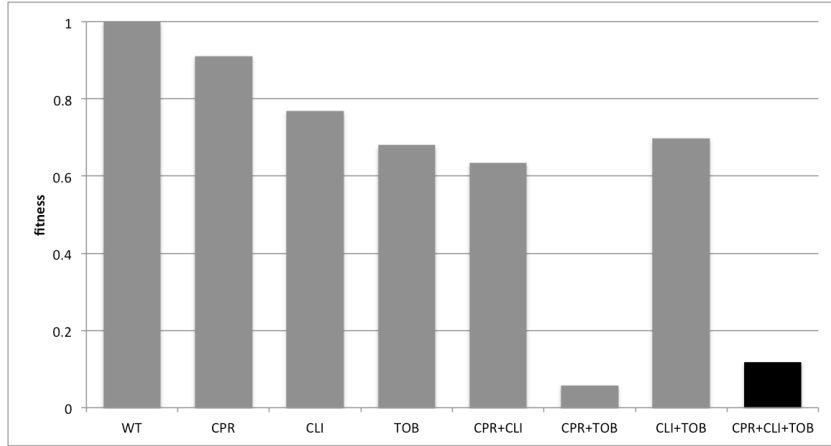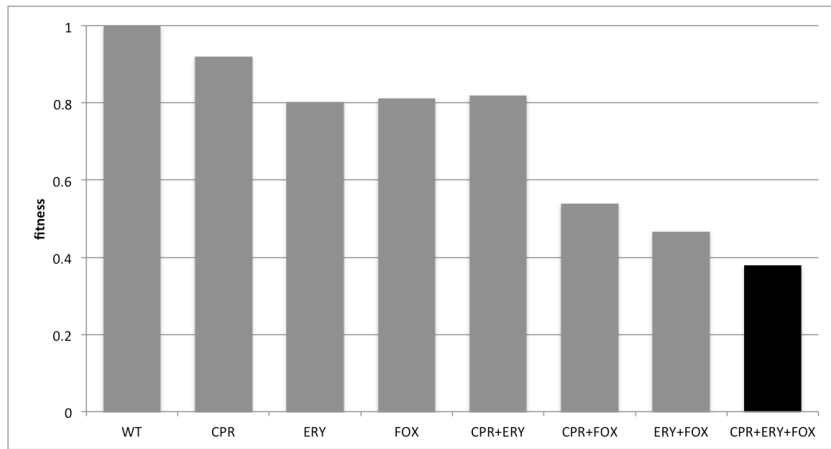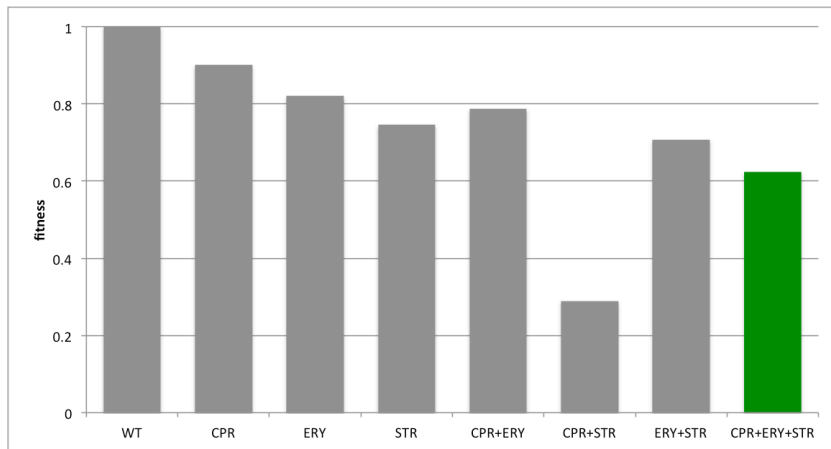

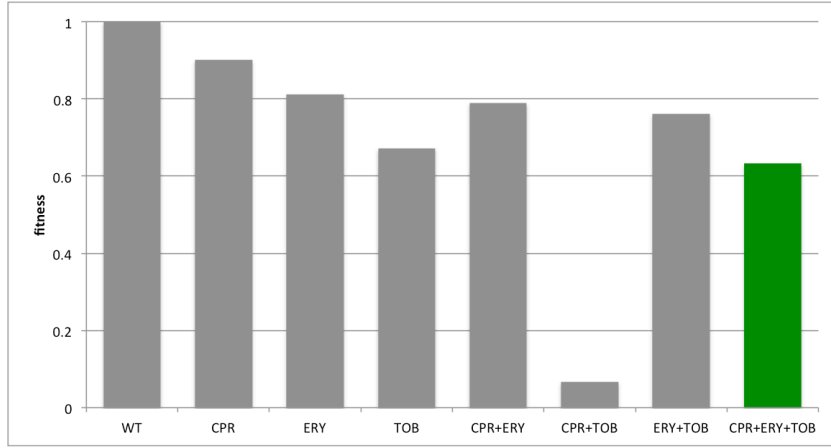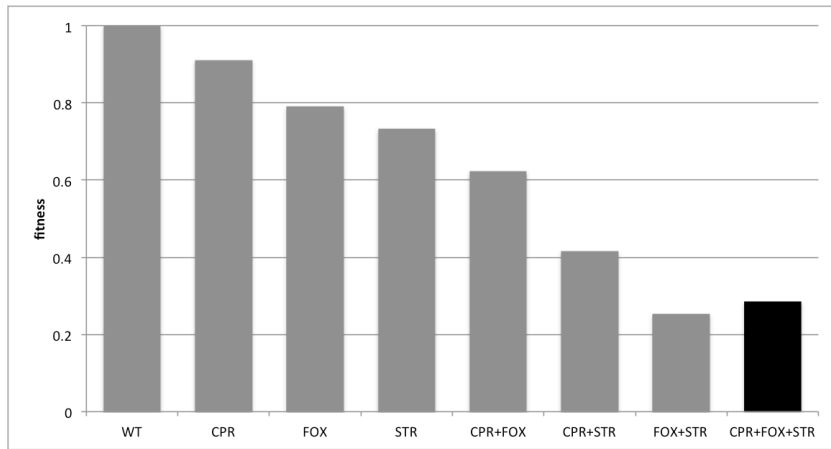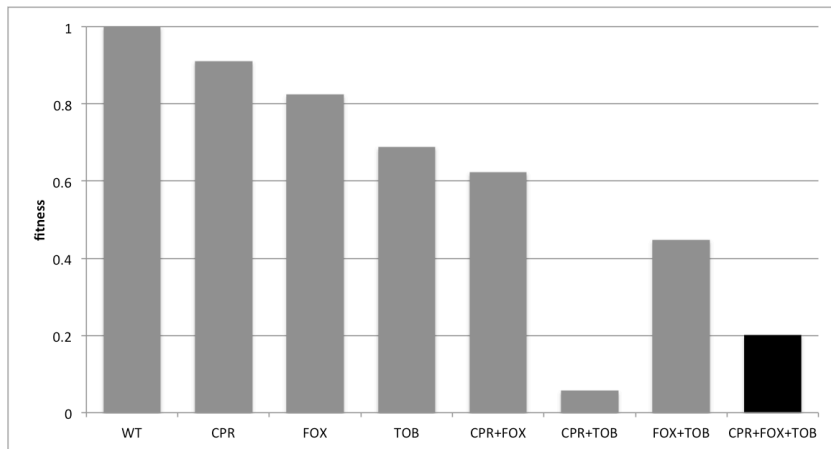

**Supplementary Figure 3. Frequency of antibiotics involved in emergent synergistic and antagonistic three-drug interactions.** **A.** Number of times each antibiotic appears in an emergent antagonism, according to emergent three-way interactions. **B.** Number of times each antibiotic appears in an emergent synergy, according to emergent three-way interactions. Antibiotic abbreviations are given in Table 1.

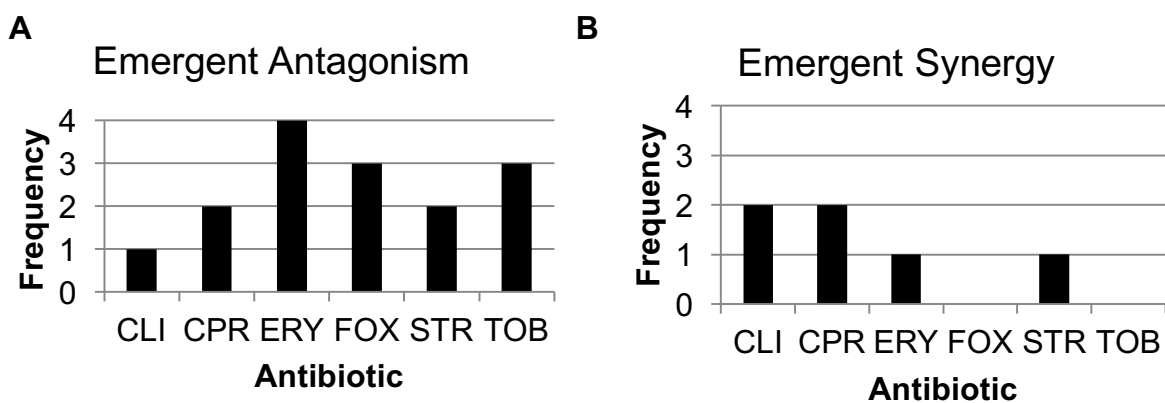



### Supplementary Table 1. Data for triple-drug interaction assays. Growth

percentages as compared to the no-drug control (100% growth) are given as median and maximum/minimum for the three single-drug conditions, the three two-drug combinations, and the triple combination. All triple combination experiments were repeated independently 2 or 3 times, each with 4-6 wells for each condition. (Note: only data for one concentration of each antibiotic is shown. Thus, although each three-drug combination was tested a minimum of three times, n may be 2 for a certain concentration.) Measure of deviation from additivity and emergent three-way interactions, described in the methods, are given for each triple combination. For cases in which a two-drug combination results in lethality, the emergent three-way interaction measure is non-applicable because it is not possible to determine the effect of the third drug. Antibiotic abbreviations are given in Table 1. All antibiotic concentrations are given in µg/ml.

|                                                | Single<br>1<br>Growth<br>% | Single<br>2<br>Growth<br>% | Single<br>3<br>Growth<br>% | Double 1<br>Growth % | Double 2<br>Growth % | Double 3<br>Growth % | Triple<br>Growth % | Rescaled<br>Deviation<br>From<br>Additivity | Rescaled<br>Emergent<br>Three-Way<br>Interaction |
|------------------------------------------------|----------------------------|----------------------------|----------------------------|----------------------|----------------------|----------------------|--------------------|---------------------------------------------|--------------------------------------------------|
| <b>CLI<br/>31.5+CPR<br/>0.013+ERY<br/>14</b>   |                            |                            |                            |                      |                      |                      |                    |                                             |                                                  |
|                                                | CLI                        | CPR                        | ERY                        | CLI+CPR              | CLI+ERY              | CPR+ERY              | CLI+CPR+<br>ERY    |                                             |                                                  |
| Median (n=2)                                   | 68.9                       | 87.9                       | 77.6                       | 50.0                 | 61.2                 | 75.8                 | 19.6               | -0.5826                                     | -0.6139                                          |
| Max                                            | 72.5                       | 88.4                       | 77.8                       | 76.3                 | 62.8                 | 76.3                 | 27.0               |                                             |                                                  |
| Min                                            | 65.3                       | 87.3                       | 77.5                       | 23.6                 | 59.6                 | 75.4                 | 12.2               |                                             |                                                  |
| <b>CLI<br/>31.5+CPR<br/>0.013+FOX<br/>1.16</b> |                            |                            |                            |                      |                      |                      |                    |                                             |                                                  |
|                                                | CLI                        | CPR                        | FOX                        | CLI+CPR              | CLI+FOX              | CPR+FOX              | CLI+CPR+<br>FOX    |                                             |                                                  |
| Median (n=3)                                   | 65.3                       | 88.4                       | 57.4                       | 29.0                 | 18.2                 | 37.6                 | 14.6               | -0.5585                                     | 0.3561                                           |
| Max                                            | 71.5                       | 91.8                       | 93.6                       | 76.3                 | 38.9                 | 60.8                 | 17.3               |                                             |                                                  |
| Min                                            | 64.3                       | 63.8                       | 56.3                       | 26.0                 | 14.1                 | 16.3                 | 9.7                |                                             |                                                  |
| <b>CPR<br/>0.01+CLI<br/>31.5+STR 4.5</b>       |                            |                            |                            |                      |                      |                      |                    |                                             |                                                  |
|                                                | CPR                        | CLI                        | STR                        | CPR+CLI              | CPR+STR              | CLI+STR              | CPR+CLI+<br>STR    |                                             |                                                  |
| Median (n=5)                                   | 89.0                       | 74.4                       | 73.3                       | 47.5                 | 16.1                 | 64.0                 | 0.1                | -0.9971                                     | -0.9791                                          |
| Max                                            | 92.1                       | 77.8                       | 84.2                       | 64.6                 | 60.2                 | 66.5                 | 0.3                |                                             |                                                  |

|              |      |      |      |         |         |         |             |         |         |  |
|--------------|------|------|------|---------|---------|---------|-------------|---------|---------|--|
| Min          | 55.1 | 70.6 | 58.8 | 13.5    | 0.3     | 55.5    | 0.0         |         |         |  |
| CPR          |      |      |      |         |         |         |             |         |         |  |
| 0.01+CLI     |      |      |      |         |         |         |             |         |         |  |
| 31.5+TOB 1.3 | CPR  | CLI  | TOB  | CPR+CLI | CPR+TOB | CLI+TOB | CPR+CLI+TOB |         |         |  |
| Median (n=5) | 91.1 | 76.9 | 68.0 | 63.4    | 5.7     | 69.7    | 11.8        | -0.7524 | -0.2499 |  |
| Max          | 92.4 | 78.9 | 73.5 | 64.6    | 22.9    | 76.6    | 48.4        |         |         |  |
| Min          | 55.1 | 70.6 | 59.7 | 13.5    | 0.3     | 65.7    | 0.1         |         |         |  |
| CLI          |      |      |      |         |         |         |             |         |         |  |
| 31.5+ERY     |      |      |      |         |         |         |             |         |         |  |
| 14+FOX 1.16  | CLI  | ERY  | FOX  | CLI+ERY | CLI+FOX | ERY+FOX | CLI+ERY+FOX |         |         |  |
| Median (n=4) | 64.5 | 79.6 | 83.1 | 64.3    | 31.0    | 55.0    | 24.2        | -0.4343 | -0.1435 |  |
| Max          | 82.5 | 82.0 | 94.6 | 73.5    | 38.3    | 65.1    | 35.3        |         |         |  |
| Min          | 59.0 | 73.3 | 70.9 | 60.7    | 18.9    | 37.0    | 20.4        |         |         |  |
| CLI          |      |      |      |         |         |         |             |         |         |  |
| 31.5+ERY     |      |      |      |         |         |         |             |         |         |  |
| 14+STR 4.5   | CLI  | ERY  | STR  | CLI+ERY | CLI+STR | ERY+STR | CLI+ERY+STR |         |         |  |
| Median (n=2) | 68.9 | 77.6 | 55.2 | 61.2    | 58.5    | 66.5    | 54.5        | 0.9730  | -0.1742 |  |
| Max          | 72.5 | 77.8 | 55.2 | 62.8    | 61.8    | 72.4    | 57.7        |         |         |  |
| Min          | 65.3 | 77.5 | 55.1 | 59.6    | 55.1    | 60.5    | 51.2        |         |         |  |
| CLI          |      |      |      |         |         |         |             |         |         |  |
| 31.5+ERY     |      |      |      |         |         |         |             |         |         |  |
| 14+TOB 1.3   | CLI  | ERY  | TOB  | CLI+ERY | CLI+TOB | ERY+TOB | CLI+ERY+TOB |         |         |  |
| Median (n=4) | 70.6 | 77.6 | 93.3 | 61.8    | 66.5    | 74.6    | 63.4        | 0.6261  | 0.3349  |  |
| Max          | 74.5 | 83.1 | 94.5 | 70.5    | 73.8    | 81.7    | 70.1        |         |         |  |
| Min          | 65.3 | 77.3 | 80.9 | 59.6    | 66.1    | 73.6    | 60.0        |         |         |  |
| CLI          |      |      |      |         |         |         |             |         |         |  |
| 31.5+FOX     |      |      |      |         |         |         |             |         |         |  |
| 1.16+STR 4.5 | CLI  | FOX  | STR  | CLI+FOX | CLI+STR | FOX+STR | CLI+FOX+STR |         |         |  |
| Median (n=6) | 70.9 | 80.7 | 69.6 | 39.2    | 58.2    | 20.4    | 37.5        | -0.0594 | 0.4696  |  |
| Max          | 76.9 | 93.6 | 92.8 | 44.5    | 66.5    | 29.0    | 41.3        |         |         |  |
| Min          | 61.5 | 57.4 | 51.4 | 14.1    | 47.6    | 0.7     | 0.9         |         |         |  |
| CLI          |      |      |      |         |         |         |             |         |         |  |
| 31.5+FOX     |      |      |      |         |         |         |             |         |         |  |
| 1.16+TOB 1.3 | CLI  | FOX  | TOB  | CLI+FOX | CLI+TOB | FOX+TOB | CLI+FOX+TOB |         |         |  |
| Median (n=4) | 68.4 | 69.8 | 86.9 | 28.6    | 65.9    | 18.1    | 39.5        | -0.0479 | 0.5766  |  |
| Max          | 74.5 | 93.6 | 93.7 | 48.7    | 73.8    | 46.9    | 55.6        |         |         |  |
| Min          | 64.3 | 56.3 | 67.3 | 14.1    | 46.0    | 14.0    | 18.7        |         |         |  |
| CLI          |      |      |      |         |         |         |             |         |         |  |
| 31.5+STR     |      |      |      |         |         |         |             |         |         |  |
| 4.5+TOB 1.3  | CLI  | STR  | TOB  | CLI+STR | CLI+TOB | STR+TOB | CLI+STR+TOB |         |         |  |
| Median (n=7) | 73.1 | 75.2 | 68.9 | 61.3    | 72.1    | 0.7     | 0.8         | -0.9784 | N/A     |  |
| Max          | 76.9 | 92.8 | 93.7 | 66.5    | 75.0    | 2.5     | 13.0        |         |         |  |
| Min          | 61.5 | 39.9 | 65.0 | 48.9    | 61.5    | 0.0     | 0.1         |         |         |  |

| CPR<br>0.01+ERY<br>14+FOX 1.16 |      |      |      |         |         |         |                 |         |        |
|--------------------------------|------|------|------|---------|---------|---------|-----------------|---------|--------|
|                                | CPR  | ERY  | FOX  | CPR+ERY | CPR+FOX | ERY+FOX | CPR+ERY<br>+FOX |         |        |
| Median (n=2)                   | 92.0 | 80.3 | 81.1 | 82.0    | 53.9    | 46.7    | 37.9            | -0.3673 | 0.1068 |
| Max                            | 92.4 | 82.2 | 82.6 | 84.3    | 55.7    | 52.2    | 42.2            |         |        |
| Min                            | 91.7 | 78.5 | 79.6 | 79.6    | 52.1    | 41.2    | 33.7            |         |        |

| CPR<br>0.01+ERY<br>14+STR 4.5 |      |      |      |         |         |         |                 |        |        |
|-------------------------------|------|------|------|---------|---------|---------|-----------------|--------|--------|
|                               | CPR  | ERY  | STR  | CPR+ERY | CPR+STR | ERY+STR | CPR+ERY<br>+STR |        |        |
| Median (n=4)                  | 90.0 | 82.0 | 74.6 | 78.7    | 28.9    | 70.7    | 62.4            | 0.3735 | 0.6843 |
| Max                           | 92.1 | 85.5 | 84.2 | 79.9    | 60.2    | 76.9    | 77.8            |        |        |
| Min                           | 88.0 | 79.6 | 65.9 | 74.5    | 15.3    | 68.7    | 55.5            |        |        |

| CPR<br>0.01+ERY<br>14+TOB 1.3 |      |      |      |         |         |         |                 |        |        |
|-------------------------------|------|------|------|---------|---------|---------|-----------------|--------|--------|
|                               | CPR  | ERY  | TOB  | CPR+ERY | CPR+TOB | ERY+TOB | CPR+ERY<br>+TOB |        |        |
| Median (n=4)                  | 90.0 | 81.1 | 67.2 | 79.0    | 6.6     | 76.1    | 63.3            | 0.7857 | 0.8987 |
| Max                           | 92.4 | 85.5 | 73.5 | 79.9    | 22.9    | 77.5    | 67.6            |        |        |
| Min                           | 88.0 | 78.5 | 65.0 | 74.5    | 0.3     | 71.8    | 60.2            |        |        |

| CPR<br>0.01+FOX<br>1.16+STR 4.5 |      |      |      |         |         |         |                 |         |        |
|---------------------------------|------|------|------|---------|---------|---------|-----------------|---------|--------|
|                                 | CPR  | FOX  | STR  | CPR+FOX | CPR+STR | FOX+STR | CPR+FOX<br>+STR |         |        |
| Median (n=3)                    | 91.1 | 79.0 | 73.3 | 62.3    | 41.7    | 25.3    | 28.6            | -0.4586 | 0.4200 |
| Max                             | 92.1 | 82.4 | 84.2 | 83.2    | 60.2    | 29.0    | 36.9            |         |        |
| Min                             | 88.0 | 78.9 | 65.9 | 61.6    | 16.1    | 23.2    | 10.8            |         |        |

| CPR<br>0.01+FOX<br>1.16+TOB 1.3 |      |      |      |         |         |         |                 |         |        |
|---------------------------------|------|------|------|---------|---------|---------|-----------------|---------|--------|
|                                 | CPR  | FOX  | TOB  | CPR+FOX | CPR+TOB | FOX+TOB | CPR+FOX<br>+TOB |         |        |
| Median (n=3)                    | 91.1 | 82.4 | 68.9 | 62.3    | 5.7     | 44.8    | 20.1            | -0.6108 | 0.4187 |
| Max                             | 92.4 | 82.6 | 73.5 | 83.2    | 22.9    | 46.8    | 39.7            |         |        |
| Min                             | 88.0 | 79.0 | 65.0 | 55.7    | 0.3     | 36.6    | 0.4             |         |        |

| CPR<br>0.01+STR<br>4.5+TOB 1.3 |      |      |      |         |         |         |                 |         |     |
|--------------------------------|------|------|------|---------|---------|---------|-----------------|---------|-----|
|                                | CPR  | STR  | TOB  | CPR+STR | CPR+TOB | STR+TOB | CPR+STR<br>+TOB |         |     |
| Median (n=3)                   | 89.0 | 73.3 | 65.5 | 16.1    | 7.5     | 0.0     | 0.0             | -0.9994 | N/A |
| Max                            | 91.1 | 75.9 | 68.9 | 41.7    | 22.9    | 2.5     | 0.0             |         |     |
| Min                            | 88.0 | 65.9 | 65.0 | 15.3    | 5.7     | 0.0     | 0.0             |         |     |

| ERY 14+FOX<br>1.16+STR 4.5 |      |      |      |         |         |         |                 |        |        |
|----------------------------|------|------|------|---------|---------|---------|-----------------|--------|--------|
|                            | ERY  | FOX  | STR  | ERY+FOX | ERY+STR | FOX+STR | ERY+FOX<br>+STR |        |        |
| Median (n=4)               | 80.6 | 80.7 | 69.6 | 52.8    | 70.1    | 24.3    | 47.9            | 0.1101 | 0.5416 |
| Max                        | 85.5 | 93.6 | 84.2 | 54.4    | 76.9    | 29.0    | 51.4            |        |        |
| Min                        | 77.5 | 78.9 | 55.1 | 33.7    | 60.5    | 7.9     | 41.1            |        |        |

|                                |      |      |      |         |         |         |                 |         |        |
|--------------------------------|------|------|------|---------|---------|---------|-----------------|---------|--------|
| ERY 14+FOX<br>1.16+TOB 1.3     | ERY  | FOX  | TOB  | ERY+FOX | ERY+TOB | FOX+TOB | ERY+FOX<br>+TOB |         |        |
| Median (n=2)                   | 79.7 | 90.3 | 96.3 | 60.0    | 78.3    | 17.1    | 56.8            | -0.1802 | 0.6997 |
| Max                            | 82.0 | 94.6 | 99.6 | 65.1    | 81.4    | 17.6    | 62.8            |         |        |
| Min                            | 77.3 | 86.0 | 93.0 | 54.8    | 75.2    | 16.7    | 50.8            |         |        |
| ERY 14+STR<br>4.5+TOB 1.3      | ERY  | STR  | TOB  | ERY+STR | ERY+TOB | STR+TOB | ERY+STR<br>+TOB |         |        |
| Median (n=9)                   | 82.3 | 75.2 | 68.9 | 71.5    | 75.6    | 0.8     | 1.5             | -0.9654 | N/A    |
| Max                            | 87.9 | 92.8 | 93.7 | 76.9    | 81.7    | 78.9    | 65.4            |         |        |
| Min                            | 75.6 | 39.9 | 59.7 | 33.2    | 69.9    | 0.0     | 0.3             |         |        |
| FOX<br>1.16+STR<br>4.5+TOB 1.3 | FOX  | STR  | TOB  | FOX+STR | FOX+TOB | STR+TOB | FOX+STR<br>+TOB |         |        |
| Median (n=6)                   | 80.3 | 74.3 | 85.1 | 12.8    | 39.4    | 0.7     | 0.3             | -0.9939 | N/A    |
| Max                            | 93.6 | 92.8 | 93.7 | 29.0    | 57.1    | 50.8    | 11.4            |         |        |
| Min                            | 57.4 | 51.4 | 65.0 | 0.4     | 14.0    | 0.0     | 0.0             |         |        |

### Supplementary Table 2. Dose-Dependence data for single drugs ([X], [2X], [3X]).

Antibiotic abbreviations are listed in Table 1, TMP=trimethoprim, CHL=chloramphenicol, AMP=ampicillin, and GEN=gentamycin. Note that because of variable inhibitory effects of single-drug treatments between experiments, single drug doses may not be identical to the triple-drug experiment doses.

|              | Single [X]<br>Growth % | Double [2X]<br>Growth % | Triple [3X]<br>Growth % | Pairwise<br>Deviation From<br>Additivity Result | Triple Deviation<br>From Additivity<br>Result | Emergent Three-Way<br>Interaction Result |
|--------------|------------------------|-------------------------|-------------------------|-------------------------------------------------|-----------------------------------------------|------------------------------------------|
| TMP 0.08     | TMP                    | TMP+TMP                 | TMP+TMP+TMP             |                                                 |                                               |                                          |
| Median (n=3) | 89.34                  | 35.58                   | 0.70                    | Synergy                                         | Synergy                                       | Additive                                 |
| Max          | 92.87                  | 39.43                   | 1.14                    |                                                 |                                               |                                          |
| Min          | 83.65                  | 25.46                   | 0.69                    |                                                 |                                               |                                          |
| CPR 0.01     | CPR                    | CPR+CPR                 | CPR+CPR+CPR             |                                                 |                                               |                                          |
| Median (n=3) | 95.61                  | 64.20                   | 12.48                   | Additive                                        | Synergy                                       | Additive                                 |
| Max          | 96.07                  | 65.10                   | 22.24                   |                                                 |                                               |                                          |
| Min          | 93.88                  | 61.84                   | 11.06                   |                                                 |                                               |                                          |

|              |       |         |             |            |            |          |
|--------------|-------|---------|-------------|------------|------------|----------|
| CHL 40       | CHL   | CHL+CHL | CHL+CHL+CHL |            |            |          |
| Median (n=3) | 73.60 | 49.60   | 37.89       | Additive   | Additive   | Additive |
| Max          | 74.93 | 60.50   | 46.32       |            |            |          |
| Min          | 72.54 | 48.78   | 36.54       |            |            |          |
| CLI 20       | CLI   | CLI+CLI | CLI+CLI+CLI |            |            |          |
| Median (n=3) | 72.91 | 48.04   | 39.19       | Additive   | Additive   | Additive |
| Max          | 80.45 | 49.66   | 39.55       |            |            |          |
| Min          | 71.15 | 46.58   | 38.35       |            |            |          |
| AMP 1.0      | AMP   | AMP+AMP | AMP+AMP+AMP |            |            |          |
| Median (n=3) | 77.83 | 36.87   | 0.71        | Additive   | Additive   | Additive |
| Max          | 79.06 | 46.49   | 1.09        |            |            |          |
| Min          | 76.77 | 36.19   | 0.65        |            |            |          |
| TOB 0.5      | TOB   | TOB+TOB | TOB+TOB+TOB |            |            |          |
| Median (n=3) | 69.04 | 58.60   | 62.25       | Synergy    | Antagonism | Additive |
| Max          | 73.62 | 67.20   | 63.13       |            |            |          |
| Min          | 68.89 | 57.37   | 43.21       |            |            |          |
| ERY 30       | ERY   | ERY+ERY | ERY+ERY+ERY |            |            |          |
| Median (n=3) | 59.09 | 44.27   | 28.98       | Additive   | Additive   | Additive |
| Max          | 63.81 | 44.41   | 29.32       |            |            |          |
| Min          | 56.73 | 42.13   | 28.05       |            |            |          |
| FOX 1        | FOX   | FOX+FOX | FOX+FOX+FOX |            |            |          |
| Median (n=3) | 62.63 | 32.29   | 17.04       | Additive   | Additive   | Additive |
| Max          | 63.48 | 33.23   | 18.51       |            |            |          |
| Min          | 56.36 | 30.04   | 15.57       |            |            |          |
| STR 2        | STR   | STR+STR | STR+STR+STR |            |            |          |
| Median (n=3) | 70.15 | 60.53   | 36.58       | Antagonism | Additive   | Additive |
| Max          | 70.70 | 69.81   | 37.84       |            |            |          |
| Min          | 65.41 | 56.94   | 31.00       |            |            |          |
| GEN 0.4      | GEN   | GEN+GEN | GEN+GEN+GEN |            |            |          |
| Median (n=3) | 71.92 | 63.10   | 30.37       | Synergy    | Additive   | Synergy  |
| Max          | 74.55 | 65.42   | 31.31       |            |            |          |
| Min          | 67.17 | 53.33   | 27.36       |            |            |          |

### Supplementary Table 3. Comparison of 3-Way Interactions to 3-Way ANOVA

**analysis.** The 3-way ANOVA result in both linear and logarithmic space is compared with results for our DA and E3 interaction measures. We quantify agreement by using a “success” rate, which is defined according to whether 3-way ANOVA agrees with our DA or E3 measure. Since ANOVA only detects the presence of interactions but does not distinguish synergy from antagonism, we compare only whether ANOVA and DA or E3 both classify a 3-way interaction as not significant (additive) or an interaction as significant (i.e., a non-additive interaction (either synergy or antagonism)). From this perspective, the success rate represents the percent of 3-Way ANOVAs that are identified as successful for predicting **A.** emergent 3-way (E3) interaction or **B.** deviation from additivity.

**A**

Emergent Three-Way Interaction

|            | 3-Way ANOVA<br>Success Rate | log 3-Way ANOVA<br>Success Rate |
|------------|-----------------------------|---------------------------------|
| Additive   | 67%<br>(6/9)                | 89%<br>(8/9)                    |
| Synergy    | 0%<br>(0/2)                 | 0%<br>(0/2)                     |
| Antagonism | 100%<br>(5/5)               | 100%<br>(5/5)                   |

**B**

Deviation From Additivity

|            | 3-Way ANOVA<br>Success Rate | log 3-Way ANOVA<br>Success Rate |
|------------|-----------------------------|---------------------------------|
| Additive   | 38%<br>(3/8)                | 50%<br>(4/8)                    |
| Synergy    | 33%<br>(3/9)                | 0%<br>(0/9)                     |
| Antagonism | 67%<br>(2/3)                | 67%<br>(2/3)                    |

### Supplementary Text 1. Emergent four-way interaction.

As an example of our framework applied to more than three components, we derive the emergent four-way interaction measure to be

$$\begin{aligned}\hat{\varepsilon}_{V,X,Y,Z} = & w_{VXYZ} - w_V w_{XYZ} - w_X w_{VYZ} - w_Y w_{VXZ} - w_Z w_{VXY} + w_V w_X w_{YZ} + w_V w_Y w_{XZ} \\ & + w_V w_Z w_{XY} + w_X w_Y w_{VZ} + w_X w_Z w_{VY} + w_Y w_Z w_{VX} - 3w_V w_X w_Y w_Z\end{aligned}$$

Notably, this measure for four-way emergent interactions (and indeed all of our measures for emergent interactions among more than three components) differs substantially from the algebraic formulas in Wood et al. (1), which only depend on pairwise fitnesses but not on fitnesses in the presence of three or more drugs. Data for four-way interactions would provide a clear empirical test to distinguish between our expectations and those from the phenomenological formulas from Wood et al. (1).

## **Supplementary Text 2. Three-way ANOVA.**

As an additional point of comparison for the emergent three-way (E3) interaction measure, the use of ANOVA within multiple predator effects (MPE) studies suggests application of a three-way ANOVA to identify emergent interactions within our data. Because our fitness functions are exponential, an ANOVA is best performed in logarithmic space. However, with only three replicates of each experiment, variances are not reliably estimated and it is not possible to test if the data are parametric, so the conditions for testing significance in ANOVA may not be satisfied. Furthermore, any assumed increase in effective replication due to the constancy of the variance across two- and three-drug combinations is likely to be strongly violated when the drugs interact. This is partly because small changes or errors in drug concentration lead to highly non-linear effects on growth rate, such that synergistic interactions can substantially increase the variance and antagonistic interactions can substantially decrease the variance compared with the additive case. In addition, translating logarithmic three-way ANOVA into an underlying interaction measure yields logarithms of similar types of terms (e.g.,  $\log(w_X w_{YZ})$  and  $\log(w_X w_Y w_Z)$ ) as our E3 metric but with different coefficients. Thus, based on our starting definition of no interaction (i.e., Bliss independence), standard three-way ANOVA is not equivalent to the correct measure of emergent interactions. In Supplementary Table 3, we show a comparison between our interaction measures and 3-way ANOVA.



## References

1. Wood K, Nishida S, Sontag ED, Cluzel P. Mechanism-independent method for predicting response to multidrug combinations in bacteria. *Proceedings of the National Academy of Sciences of the United States of America*. 2012;109(30):12254-9.
